# Supplementary material for: Ultraviolet-responsive self-assembled metallomicelles for photocontrollable catalysis of asymmetric sulfoxidation in water
Source: Royal Society of Chemistry journal article supplement (doi:10.1039/c7ra11022g), 2017-01-01
Supplement: c7ra11022g1.pdf [file c7ra11022g1.pdf]

***Supporting Information***

Ultraviolet-responsive self-assembled metallomicelles  
for photocontrollable catalysis of asymmetric  
sulfoxidation in water

Mengqiao Gao, Rong Tan, \* Pengbo Hao, Yaoyao Zhang, Jiang Deng, Donghong Yin

Key Laboratory of Chemical Biology and Traditional Chinese Medicine Research (Ministry of  
Education); National & Local Joint Engineering Laboratory for New Petro-chemical Materials and  
Fine Utilization of Resources, Hunan Normal University, Changsha 410081 (P. R. China)

---

\* Corresponding authors. Fax: +86-731-8872531. Tel: +86-731-8872576

*E-mail:* yiyangtanrong@126.com

CONTENT:

1. Preparation and identity of the copolymers (**PN<sub>422</sub>A<sub>25</sub>-C**, **PN<sub>427</sub>A<sub>10</sub>-C**, and **PN<sub>429</sub>A<sub>5</sub>-C**)
2. LCST determination of the copolymers
3. Identity of the obtained chiral sulfoxides

## 1. Preparation and identity of the copolymers (PN<sub>422</sub>A<sub>25</sub>-C, PN<sub>427</sub>A<sub>10</sub>-C, and PN<sub>429</sub>A<sub>5</sub>-C)

### 1.1 Preparation of the copolymers of PN<sub>422</sub>A<sub>25</sub>-C and PN<sub>429</sub>A<sub>5</sub>-C.

To regulate the LCST of copolymers close to room temperature (25 °C), various ratios of NIPAAm to azobenzene blocks have been modulated in the chiral salen Ti<sup>IV</sup>-containing amphiphiles. The synthetic procedure was similar to that of PN<sub>427</sub>A<sub>10</sub>-C excepted for the varied molar feeds of NIPAAm and N-azo-acrylamide.

During the procedure, monomers of NIPAAm and *N*-azo-acrylamide with different molar feed (9.8 mmol of NIPAAm and 0.49 mmol of *N*-azo-acrylamide for PN<sub>422</sub>A<sub>25</sub>-C, 39.2 mmol of NIPAAm and 0.49 mmol of *N*-azo-acrylamide for PN<sub>429</sub>A<sub>5</sub>-C), were dissolved in THF in a Schlenk tube. AIBN (0.051 mmol for PN<sub>422</sub>A<sub>25</sub>-C, and 0.199 mmol for PN<sub>429</sub>A<sub>5</sub>-C) and 2-aminoethanethiol hydrochloride (0.10 mmol for PN<sub>422</sub>A<sub>25</sub>-C, and 0.40 mmol for PN<sub>429</sub>A<sub>5</sub>-C), which acted as a radical initiator and chain transfer reagent, were then added into the solutions. The reaction mixtures were degassed by bubbling with nitrogen gas at room temperature for 30 min. Polymerizations were carried out at 60 °C for 24 h with nitrogen protection. The mixtures were then cooled to room temperature, and followed by treating with solid KOH to liberate the terminal amino group. The obtained solutions were concentrated under vacuum. The crude products were purified by repeated precipitating from diethyl ether and followed from THF to remove unreacted monomers. After drying under vacuum for 6 h at 40 °C, the copolymers of poly(NIPAAm-*co*-Azo) was obtained as yellow powders.

The obtained copolymers of poly(NIPAAm-*co*-Azo) (0.18 mmol), (*R,R*)-*N*-(3,5-di-*tert*-butylsalicylidene)-*N'*-(3-*tert*-butyl-5-chloromethyl-salicylidene)-1,2-cyclohexanediamine (0.25 mmol, 0.137 g) and triethylamine (0.2 mmol, 0.02 g) were mixed in dry toluene (30 mL) under

room temperature. The mixtures were refluxed for 48 h under nitrogen protection. After removal of solvent, the residues were dissolved in tetrahydrofuran to remove the formed triethylamine hydrochloride through filtration. Filtrates were concentrated in vacuo, and were treated with  $\text{Ti}(\text{O}^i\text{Pr})_4$  (0.25 mmol, 0.07 g) in dichloromethane (30 mL) for 12 h at room temperature. The mixtures were concentrated under vacuum. Crude products were purified by repeatedly precipitating from tetrahydrofuran using diethyl ether as precipitant. The resulting orange solids were dissolved in chloroform (20 mL), and treated with water (2 mL) to remove any traces of  $\text{TiO}_2$  by filtration. Filtrates were concentrated in vacuum and further dried in vacuum at 40 °C overnight, giving orange powder of poly(NIPAAm-*co*-Azo)-modified chiral salen  $\text{Ti}^{\text{IV}}$  catalyst, denoted as **PN<sub>x</sub>A<sub>y</sub>-C** (where x represented the repeated units number of NIPAAM, and y represented the repeated units number of N-azo-acrylamide in copolymers. The numbers were determined by  $^1\text{H}$  NMR spectra).

### 1.2 Identity of the **PN<sub>x</sub>A<sub>y</sub>-C** by $^1\text{H}$ NMR spectra

Given mass of **PN<sub>x</sub>A<sub>y</sub>-C** (**PN<sub>422</sub>A<sub>25</sub>-C**, **PN<sub>427</sub>A<sub>10</sub>-C**, and **PN<sub>429</sub>A<sub>5</sub>-C**) were placed in NMR tubes, and the tubes were backfilled with  $\text{N}_2$ . In dark room, D-substituted solvent was added *via* syringe, and the sample was carefully shaken until full dissolution was obtained. The solutions were irradiated by visible light ( $\lambda = 410$  nm) for 30 min, and then being kept in the dark for 72 h to give dark-adapted samples for NMR determination.

**PN<sub>422</sub>A<sub>25</sub>-C** in  $\text{DMSO-}d_6$ : The structure and chemical composition of **PN<sub>422</sub>A<sub>25</sub>-C** were identified by  $^1\text{H}$  NMR spectrum carried out in  $\text{DMSO-}d_6$  (see Fig. S1).  $^1\text{H}$  NMR (500 MHz,  $\text{DMSO-}d_6$ )  $\delta$  (ppm):  $\delta$  7.91 (s, 2 H, Ph-*H* in  $\text{Ti}(\text{salen})$ ), 7.84 (m, 102 H, -N=N-Ph-*H* and Ph-*H* in  $\text{Ti}(\text{salen})$ ), 7.55 (m, 50 H, -NH-Ph-*H*), 7.52 (m, 75 H, N=N-Ph-*H*), 7.19 (m, 447 H, O=C-NH-CH

and O=C-NH-Ph), 3.83 (m, 422 H, CH<sub>3</sub>-CH-CH<sub>3</sub>), 3.5 (m, 2 H, CH=N-CH), 2.96 (m, 2 H, NH-CH<sub>2</sub>-Ph), 2.63 (m, 2 H, S-CH<sub>2</sub>-CH<sub>2</sub>-), 2.36 (m, 2 H, S-CH<sub>2</sub>-CH<sub>2</sub>-), 2.17 (m, 2 H, CH<sub>3</sub>-CH-CH<sub>3</sub> of <sup>i</sup>PrO- in Ti(salen)), 1.96 (m, 447 H, CH<sub>2</sub>-CH- in NIPAAm and *N*-azo-acrylamide), 1.45 (s, 894 H, -CH<sub>2</sub>-CH- in NIPAAm and *N*-azo-acrylamide), 1.22 (m, 8 H, cyclohexyl-*H*), 1.18 (m, 39 H, -CH<sub>3</sub> of *t*-Bu and <sup>i</sup>PrO- in Ti(salen)), 1.03 (s, 2532 H, CH<sub>3</sub>-CH-CH<sub>3</sub>).

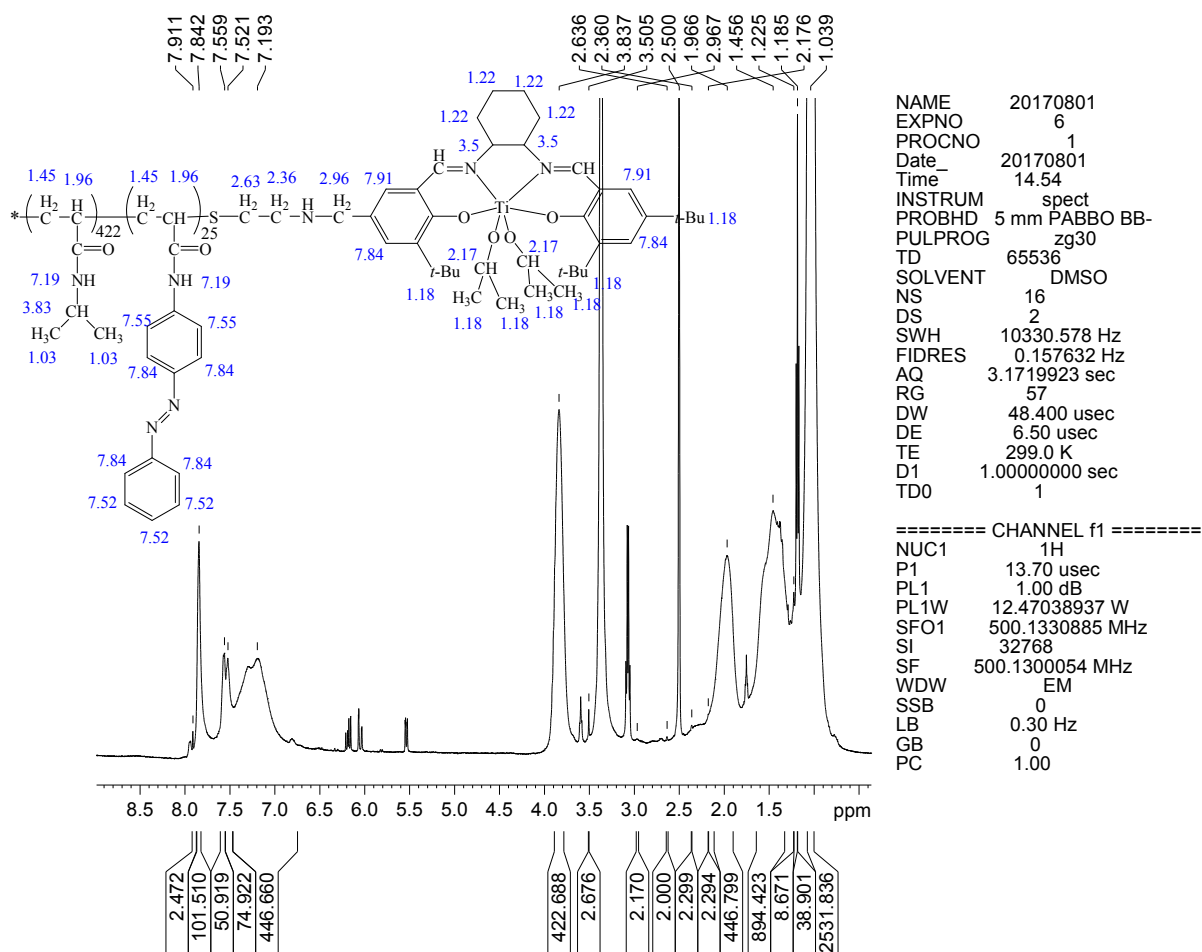

**Fig. S1** <sup>1</sup>H NMR spectrum of dark-adapted **PN<sub>422</sub>A<sub>25</sub>-C** in DMSO-*d*<sub>6</sub>.

**PN<sub>427</sub>A<sub>10</sub>-C** in DMSO-*d*<sub>6</sub>: The structure and chemical composition of **PN<sub>427</sub>A<sub>10</sub>-C** were identified by <sup>1</sup>H NMR spectrum carried out in DMSO-*d*<sub>6</sub> (see Fig. S2). <sup>1</sup>H NMR (500 MHz, DMSO-*d*<sub>6</sub>) δ (ppm): δ 9.97 (s, 2H, Ph-HC=N-), 7.90 (s, 2H, Ph-*H* in Ti(salen)), 7.84 (m, 42 H, -N=N-Ph-*H*), 7.60-7.56 (m, 20 H, O=C-NH-Ph-*H*), 7.52 (m, 30 H, N=N-Ph-*H*), 7.29-7.20 (m, 437

H, O=C-NH-CH and O=C-NH-Ph), 3.83 (m, 427 H, CH<sub>3</sub>-CH-CH<sub>3</sub> in NIPAAm), 3.17-3.16 (m, 2 H, cyclohexyl-H), 2.92-2.90 (m, 2 H, NH-CH<sub>2</sub>-Ti(salen)), 2.63 (m, 2 H, S-CH<sub>2</sub>-CH<sub>2</sub>-NH), 2.36 (m, 2 H, S-CH<sub>2</sub>-CH<sub>2</sub>-NH), 2.17 (m, 2 H, CH<sub>3</sub>-CH-CH<sub>3</sub> of <sup>i</sup>PrO- in Ti(salen)), 1.95 (m, 437 H, CH<sub>2</sub>-CH- in NIPAAm and *N*-azo-acrylamide), 1.44 (s, 874 H, -CH<sub>2</sub>-CH- in NIPAAm and *N*-azo-acrylamide), 1.22 (m, 8 H, cyclohexyl-H), 1.17 (m, 39 H, -CH<sub>3</sub> of *t*-Bu and <sup>i</sup>PrO- in Ti(salen)), 1.03 (s, 2562 H, CH<sub>3</sub>-CH-CH<sub>3</sub>).

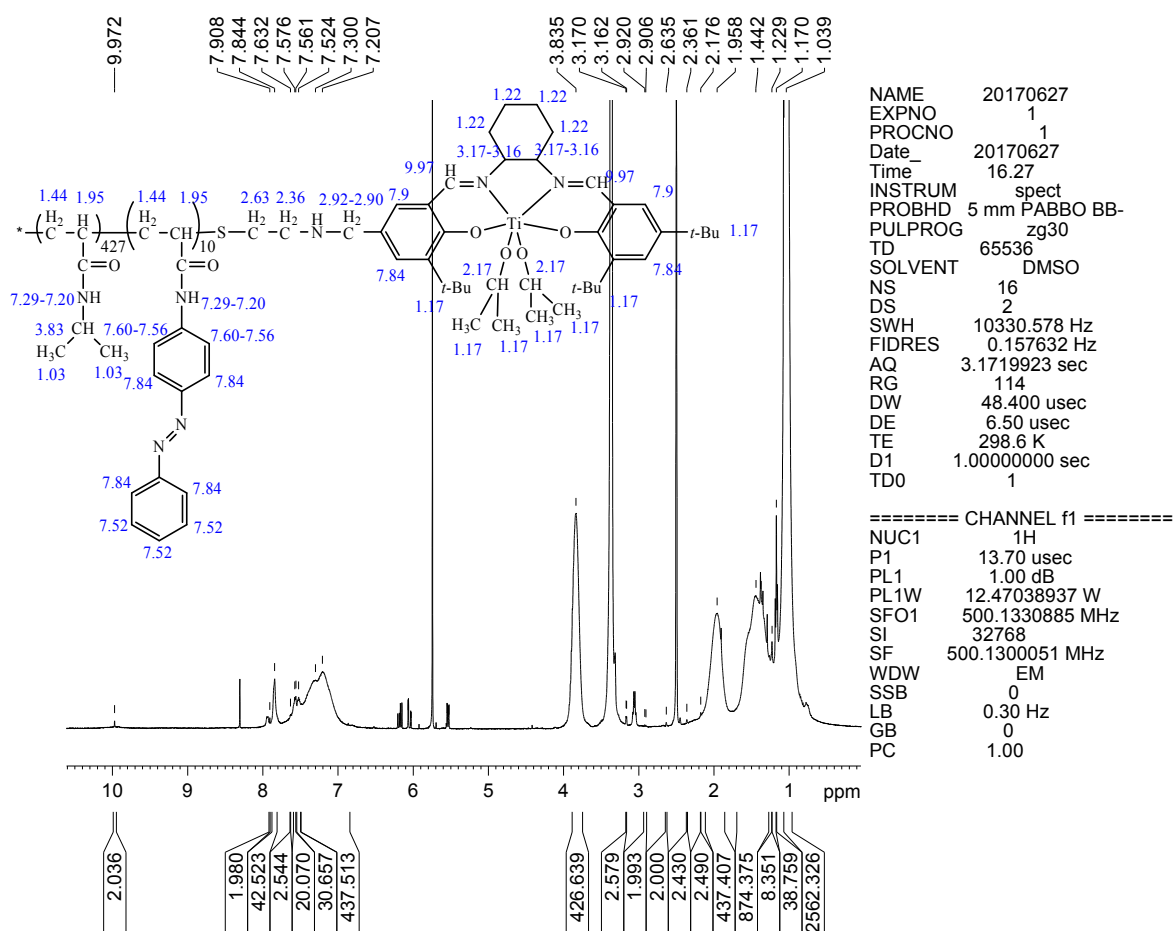

**Fig. S2** <sup>1</sup>H NMR spectrum of dark-adapted **PN<sub>427</sub>A<sub>10</sub>-C** in DMSO-*d*<sub>6</sub>.

**PN<sub>427</sub>A<sub>10</sub>-C** in D<sub>2</sub>O: Self-assembly of **PN<sub>427</sub>A<sub>10</sub>-C** in aqueous system was demonstrated by <sup>1</sup>H NMR spectrum carried out in D<sub>2</sub>O (see Fig. S3). <sup>1</sup>H NMR (500 MHz, D<sub>2</sub>O) δ (ppm): 3.92 (m, 427 H, CH<sub>3</sub>-CH-CH<sub>3</sub> in NIPAAm), 2.75 (m, 2 H, S-CH<sub>2</sub>-CH<sub>2</sub>-NH). 2.59 (m, 2 H, S-CH<sub>2</sub>-CH<sub>2</sub>-), 2.15-

2.04 (m, 427 H, CH<sub>2</sub>-CH- in NIPAAm), 1.74-1.60 (m, 854 H, -CH<sub>2</sub>-CH- in NIPAAm), 1.17 (s, 2562 H, CH<sub>3</sub>-CH-CH<sub>3</sub> in NIPAAm).

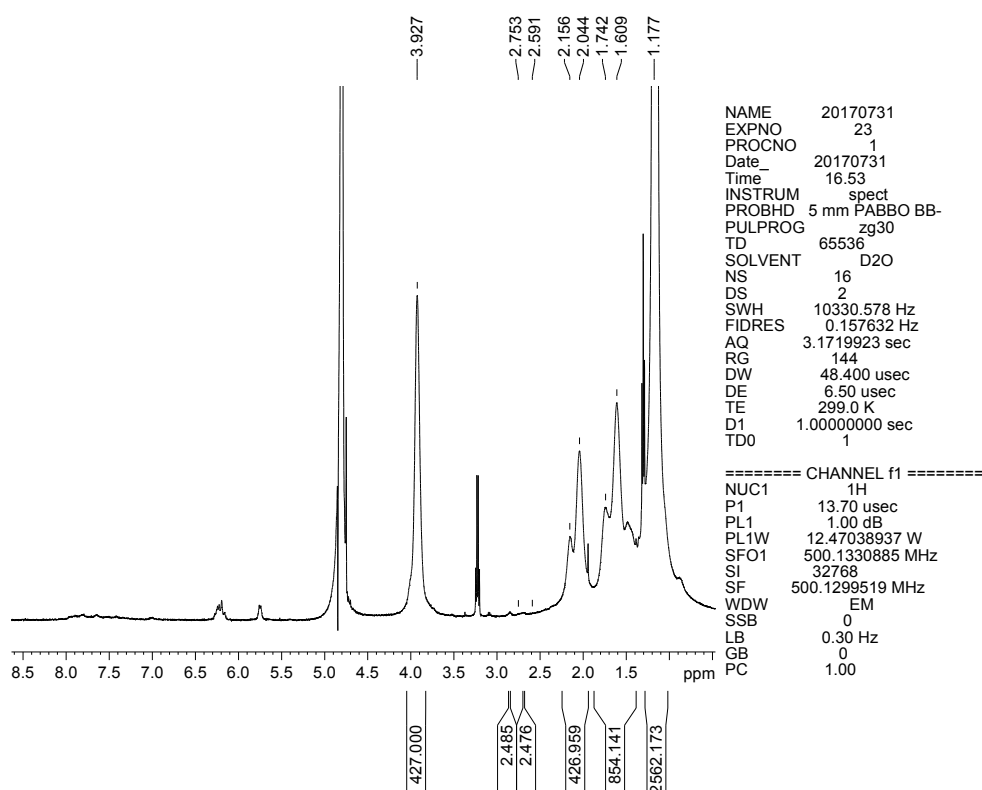

Fig. S3 <sup>1</sup>H NMR spectrum of dark-adapted PN<sub>427</sub>A<sub>10</sub>-C in D<sub>2</sub>O.

PN<sub>429</sub>A<sub>5</sub>-C in DMSO-*d*<sub>6</sub>: The structure and chemical composition of PN<sub>429</sub>A<sub>5</sub>-C were identified by <sup>1</sup>H NMR spectrum carried out in DMSO-*d*<sub>6</sub> (see Fig. S4). <sup>1</sup>H NMR (500 MHz, DMSO-*d*<sub>6</sub>)  $\delta$  (ppm): 7.90 (s, 2 H, Ph-*H* in Ti(salen)), 7.84 (m, 22 H, -N=N-Ph-*H* and Ph-*H* in Ti(salen)), 7.55 (m, 10 H, -NH-Ph-*H*), 7.52 (m, 15 H, N=N-Ph-*H*), 7.19 (m, 434 H, O=C-NH-CH and O=C-NH-Ph), 3.84 (m, 429 H, CH<sub>3</sub>-CH-CH<sub>3</sub> in NIPAAm), 3.57 (m, 2 H, cyclohexyl-*H*), 2.63 (m, 2 H, S-CH<sub>2</sub>-CH<sub>2</sub>-NH<sub>2</sub>), 2.36 (m, 2 H, S-CH<sub>2</sub>-CH<sub>2</sub>-NH), 2.17 (m, 2 H, CH<sub>3</sub>-CH-CH<sub>3</sub> of <sup>*i*</sup>PrO- in Ti(salen)) 1.96 (m, 434 H, CH<sub>2</sub>-CH-, CH<sub>2</sub>-CH- in NIPAAm and *N*-azo-acrylamide), 1.43-1.34 (s, 868 H, -CH<sub>2</sub>-CH- in NIPAAm and *N*-azo-acrylamide), 1.22 (m, 8 H, cyclohexyl-*H*), 1.17 (m, 39 H, -CH<sub>3</sub> of *t*-Bu and <sup>*i*</sup>PrO- in Ti(salen)), 1.04 (s, 2574 H, CH<sub>3</sub>-CH-CH<sub>3</sub>).

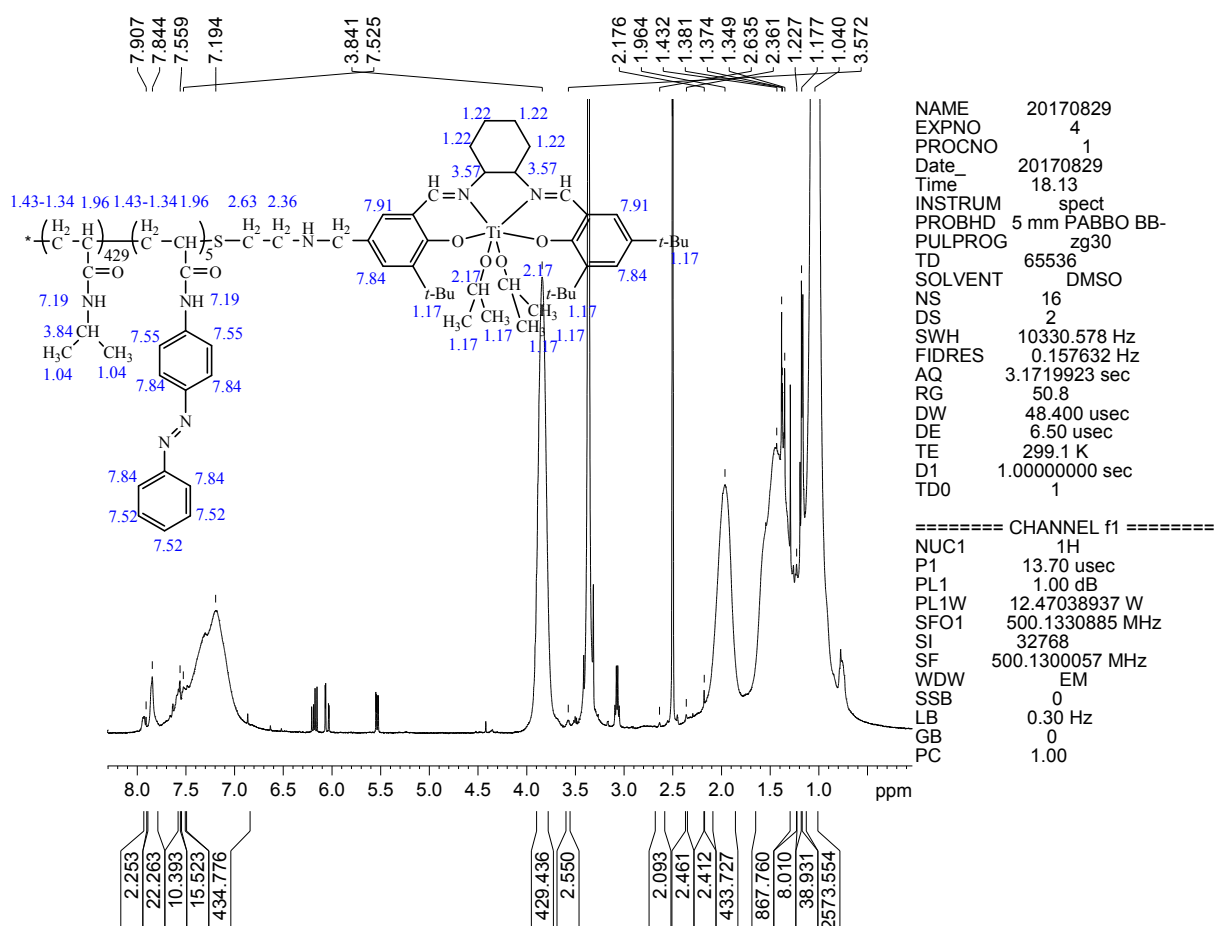

**Fig. S4**  $^1\text{H}$  NMR spectrum of dark-adapted  $\text{PN}_{429}\text{A}_5\text{-C}$  in  $\text{DMSO-}d_6$ .

## 2. LCST determination of the copolymers ( $\text{PN}_{422}\text{A}_{25}\text{-C}$ , $\text{PN}_{427}\text{A}_{10}\text{-C}$ , and $\text{PN}_{429}\text{A}_5\text{-C}$ )

The LCST of these copolymers were measured *via* UV-visible spectrophotometry by determining the turbidity of corresponding aqueous solutions at various temperatures. The copolymer concentration was  $0.8 \text{ mg. mL}^{-1}$ , and the heating rate was  $2 \text{ }^\circ\text{C/min}$ . The copolymer solution was stirred and kept at the same temperature for 1 min before each measurement. The turbidimetry curves was drawn by measuring the transmittance of the aqueous polymer solution (max = 440 nm) as a function of temperature, as shown in Fig. S5. Sharp decrease in transmittance pointed to the characteristic temperature of corresponding LCST. Therefore, the LCST of  $\text{PN}_{422}\text{A}_{25}\text{-C}$ ,  $\text{PN}_{427}\text{A}_{10}\text{-C}$ , and  $\text{PN}_{429}\text{A}_5\text{-C}$  were determined as *ca.* 14, 26, and  $28 \text{ }^\circ\text{C}$ . It was logical

that decreased hydrophobic block in PNIPAAm-based copolymer led to increase in the LCST.<sup>[1]</sup>

Apparently, **PN<sub>422</sub>A<sub>25</sub>-C** with the LCST (14 °C) lower than room temperature (25 °C) couldn't fulfill the demand of aqueous asymmetric sulfoxidation, since it would become hydrophobic and precipitate from the aqueous system at reaction temperature (25 °C). For **PN<sub>429</sub>A<sub>5</sub>-C**, although its LCST (28 °C) fitted for the aqueous asymmetric sulfoxidation, few amount of photo-responsive azobenzene moiety in the copolymer was unfavorable to finely control the aqueous asymmetric sulfoxidation by UV light. With these points in mind, more azobenzene-containing **PN<sub>427</sub>A<sub>10</sub>-C** whose LCST (26 °C) was close to room temperature was chose as the suitable catalyst for photo-controlled catalysis of asymmetric sulfoxidation in water at room temperature (25 °C). The selected **PN<sub>427</sub>A<sub>10</sub>-C** indeed made the photo-controlled asymmetric catalysis in water come true, and also could be recovered for efficient reuse at mild temperature (slightly higher than room temperature).

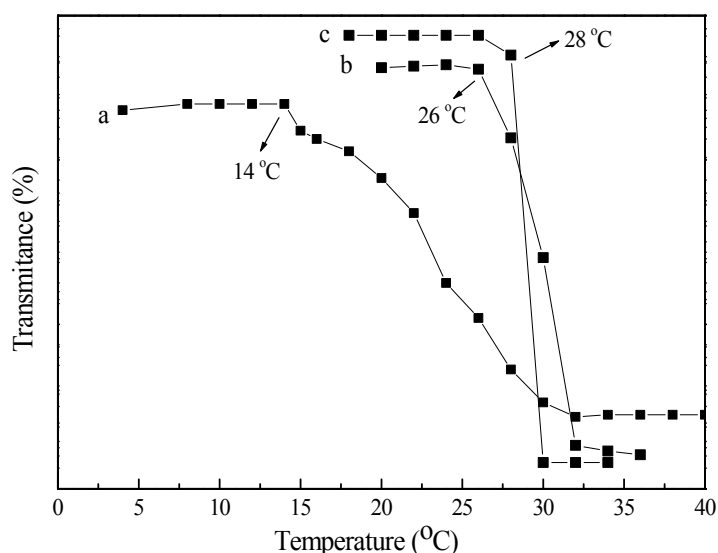

**Fig. S5** Plot of changes in solution transmittance (at 440 nm) as a function of temperature for aqueous solutions of **PN<sub>x</sub>A<sub>y</sub>-C** (concentration: 0.8 mg mL<sup>-1</sup>).

### 3. Identity of the obtained chiral sulfoxide.

**Methyl phenyl sulfoxide:** The product has been identified by  $^1\text{H}$  and  $^{13}\text{C}$  NMR spectra (see Fig. S6 and S7).  $^1\text{H}$  NMR ( $\text{CDCl}_3$ , 500 MHz)  $\delta$  (ppm): 7.44-7.42 (m, 2 H, ArH), 7.29-7.27 (m, 3 H, ArH), 2.49 (s, 3 H, Me);  $^{13}\text{C}$  NMR ( $\text{CDCl}_3$ , 125 MHz)  $\delta$  (ppm): 43.1 ( $\text{SCH}_3$ ), 122.8, 128.6, 130.3, 144.9 (ArC). Chemoselectivity was determined by GC, nitrogen was used as the carrier gas with a flow of  $30 \text{ mL} \cdot \text{min}^{-1}$ , injector temperature and detector temperature were  $250^\circ\text{C}$ , column temperature was programmed from  $80$  to  $180^\circ\text{C}$  with  $6^\circ\text{C} \cdot \text{min}^{-1}$ ,  $t_{\text{methyl phenyl sulfoxide}} = 6.9 \text{ min}$ ; ee value was determined by HPLC ( $i\text{-PrOH}/n\text{-hexane} = 5: 5 \text{ (v/v)}$ ); flow rate =  $1.0 \text{ mL} \cdot \text{min}^{-1}$ ;  $25^\circ\text{C}$ ;  $\lambda = 254 \text{ nm}$ ; major enantiomer  $t_R = 4.4 \text{ min}$ , minor enantiomer  $t_S = 5.2 \text{ min}$  (see Fig. S8, S9 and S10).

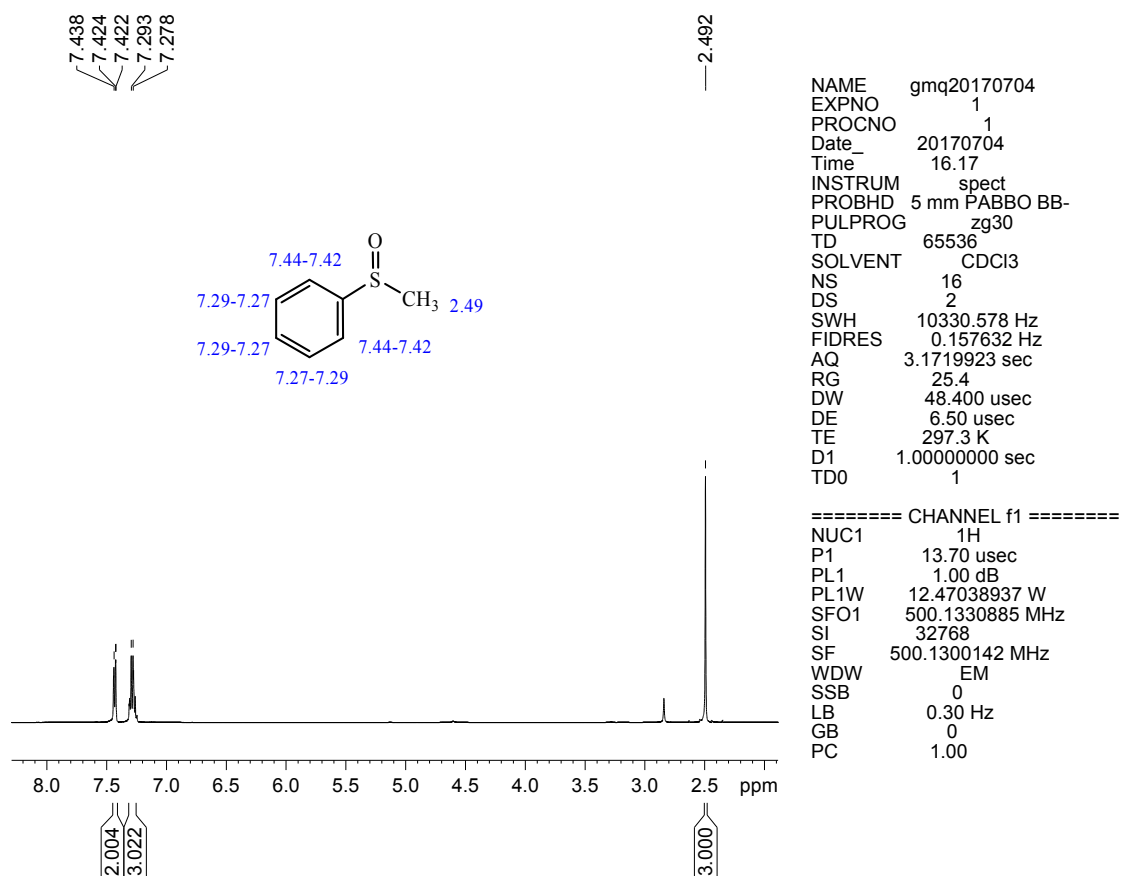

Fig. S6  $^1\text{H}$  NMR of methyl phenyl sulfoxide.

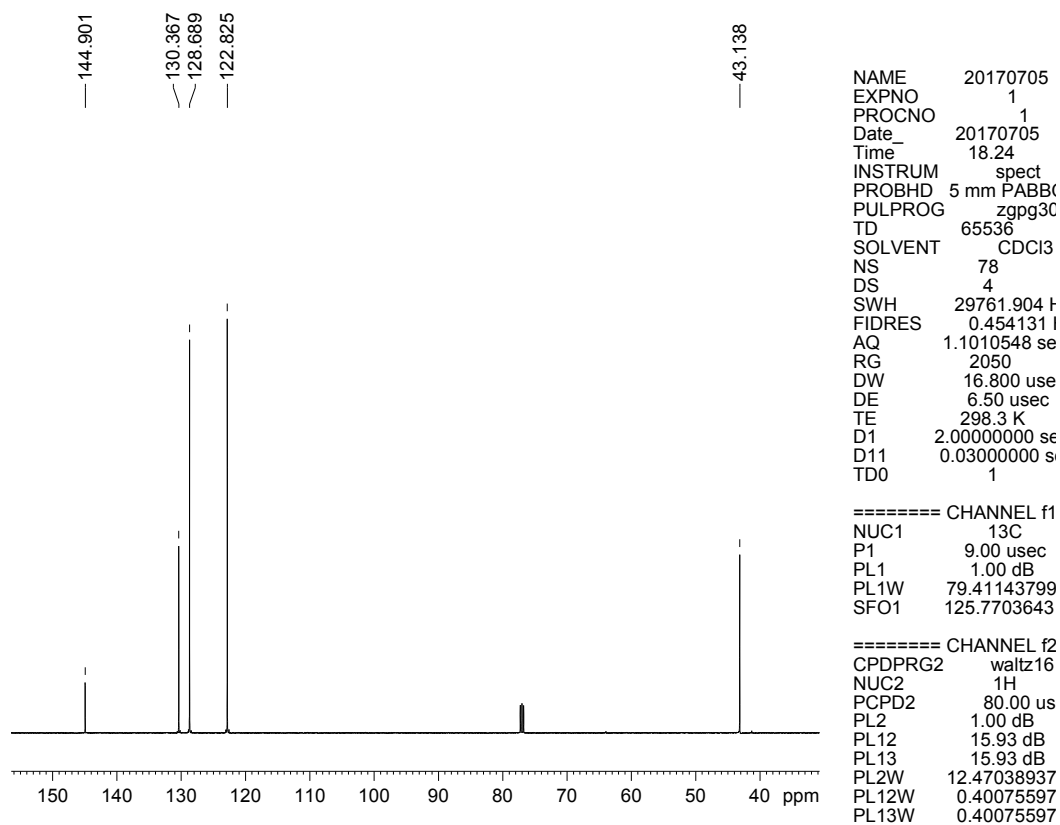

**Fig. S7**  $^{13}\text{C}$  NMR of methyl phenyl sulfoxide.

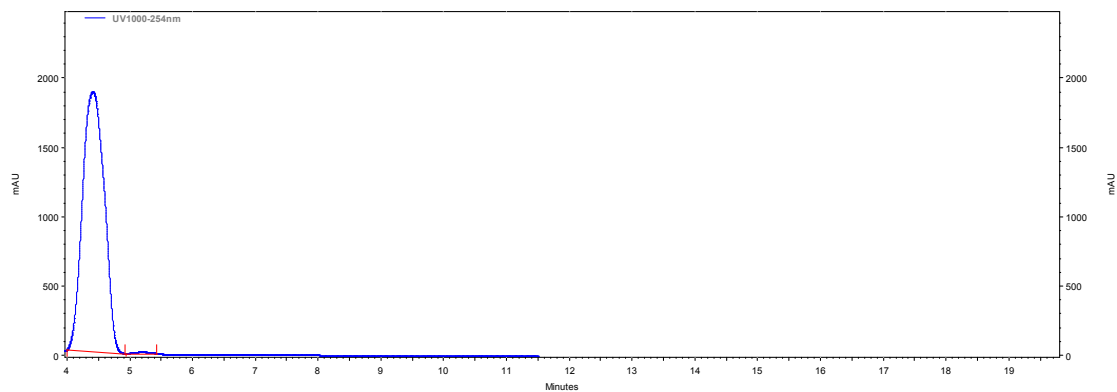

**Fig. S8** HPLC of methyl phenyl sulfoxide obtained over  $\text{PN}_{427}\text{A}_{10}\text{-C}$  after 60 s of UV irradiation (ee value = 99%).

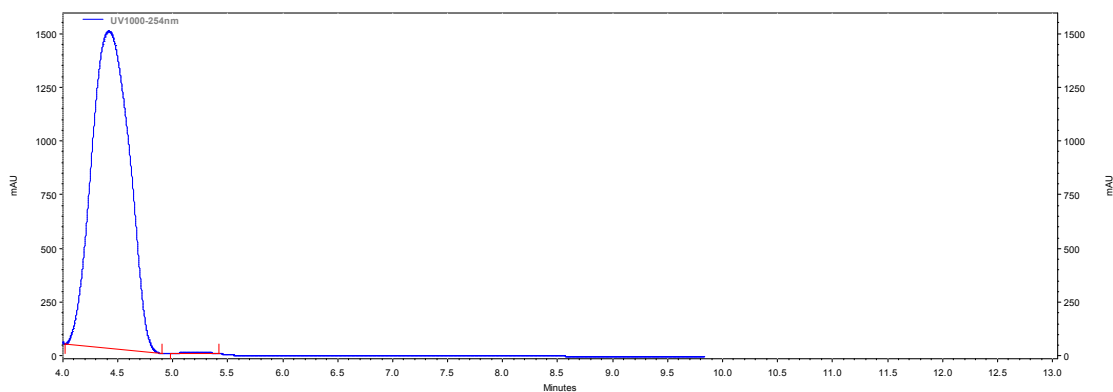

**Fig. S9** HPLC of methyl phenyl sulfoxide obtained over dark-adapted **PN<sub>427</sub>A<sub>10</sub>-C** (ee value = 99%).

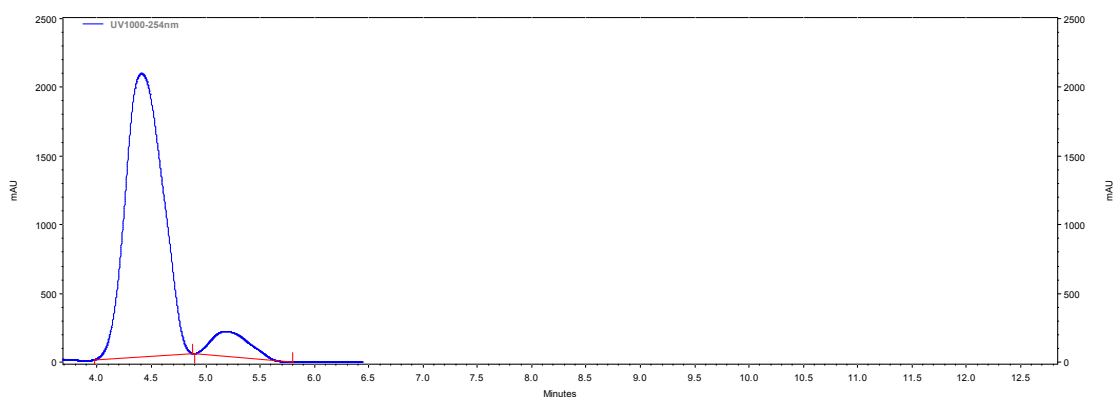

**Fig. S10** HPLC of methyl phenyl sulfoxide obtained over neat complex (ee value = 83%).

**Ethyl phenyl sulfoxide:** The product has been identified by  $^1\text{H}$  and  $^{13}\text{C}$  NMR spectra (see Fig. S11 and S12).  $^1\text{H}$  NMR ( $\text{CDCl}_3$ , 500 MHz)  $\delta$  (ppm): 7.59-7.53 (m, 2 H, ArH), 7.52-7.47 (m, 3 H, ArH), 2.92-2.72 (m, 2 H,  $-\text{CH}_2-$ ), 1.19-1.16 (m, 3 H, Me);  $^{13}\text{C}$  NMR ( $\text{CDCl}_3$ , 125 MHz)  $\delta$  (ppm): 5.91 ( $\text{CH}_3$ ), 50.24 ( $\text{SCH}_2$ ), 124.13, 129.09, 130.88, 143.25 (ArC). Chemoselectivity was determined by GC, nitrogen was used as the carrier gas with a flow of  $30 \text{ mL} \cdot \text{min}^{-1}$ , the injector temperature and the detector temperature were  $250^\circ\text{C}$ , the column temperature was  $180^\circ\text{C}$ ,  $t_{\text{ethyl phenyl sulfoxide}} = 2.5 \text{ min}$ ; ee value was determined by HPLC (*i*-PrOH/ *n*-hexane = 2: 8 (v/ v)); flow rate =  $1.0 \text{ mL} \cdot \text{min}^{-1}$ ;  $25^\circ\text{C}$ ;  $\lambda = 254 \text{ nm}$ ; major enantiomer  $t_R = 6.4 \text{ min}$  and minor enantiomer  $t_S = 8.2 \text{ min}$  (see Fig. S13, S14 and S15).

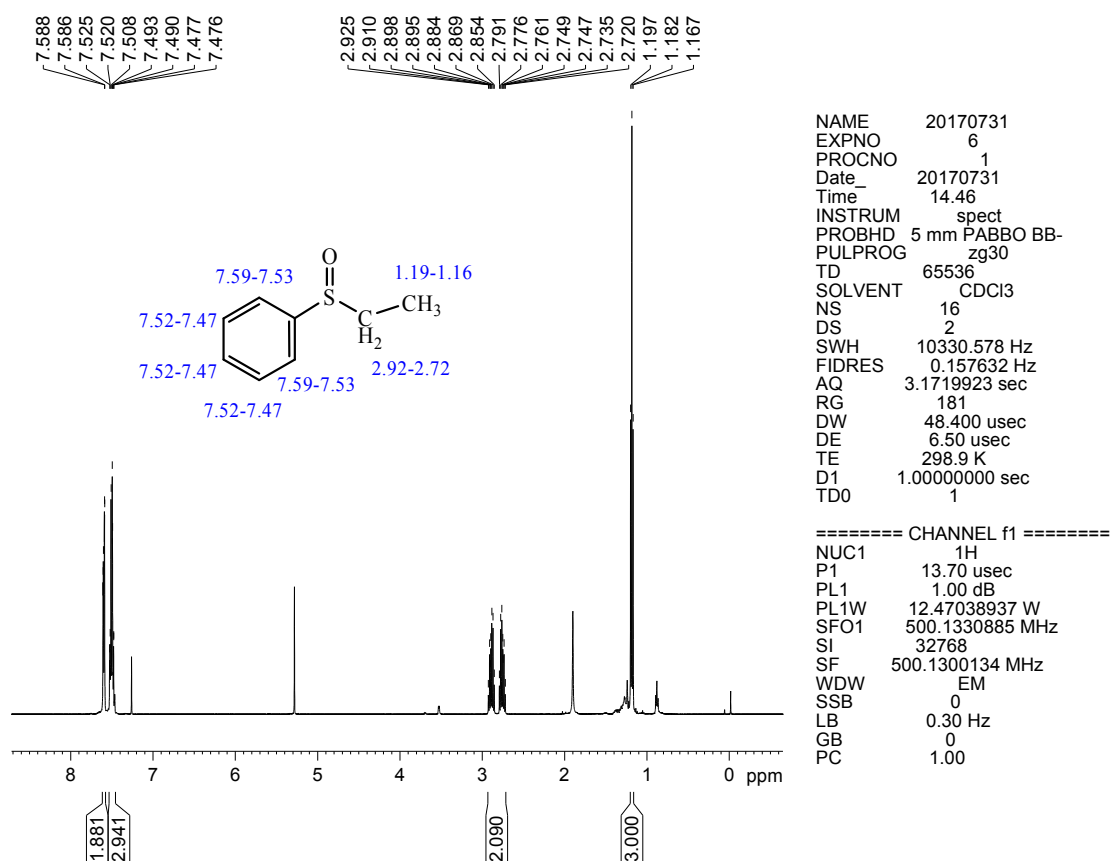

Fig. 11 <sup>1</sup>H NMR of ethyl phenyl sulfoxide.

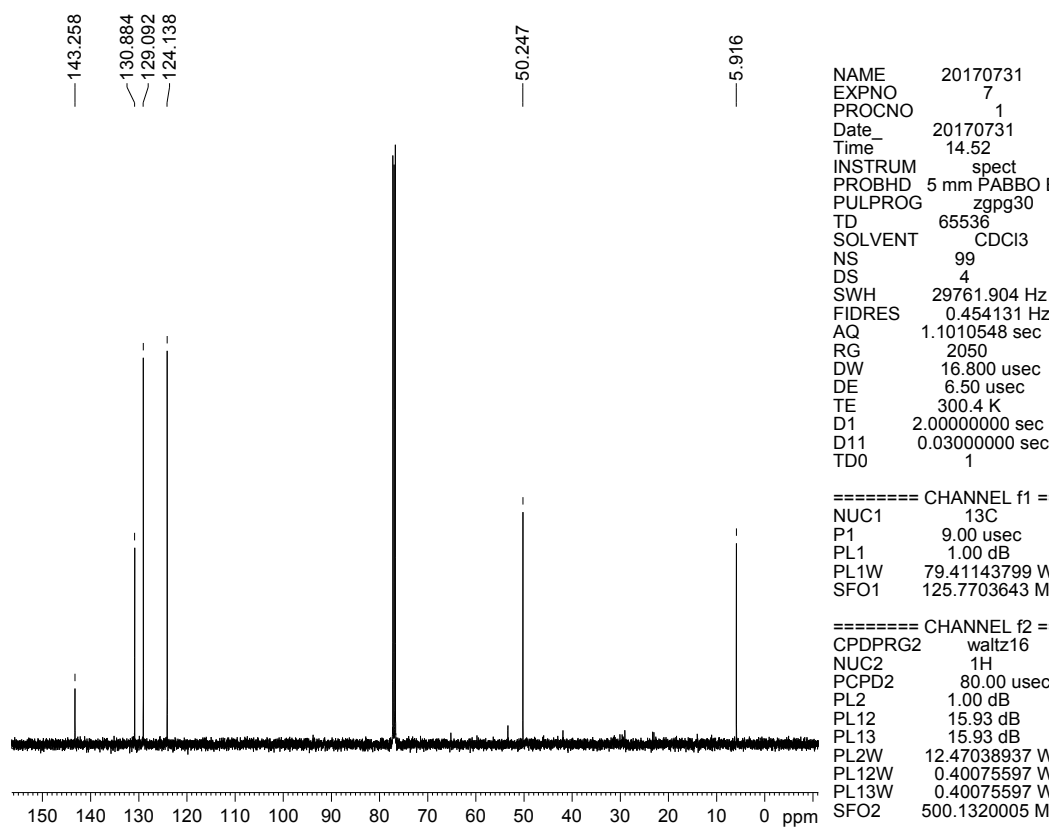

Fig. 12 <sup>13</sup>C NMR of ethyl phenyl sulfoxide.

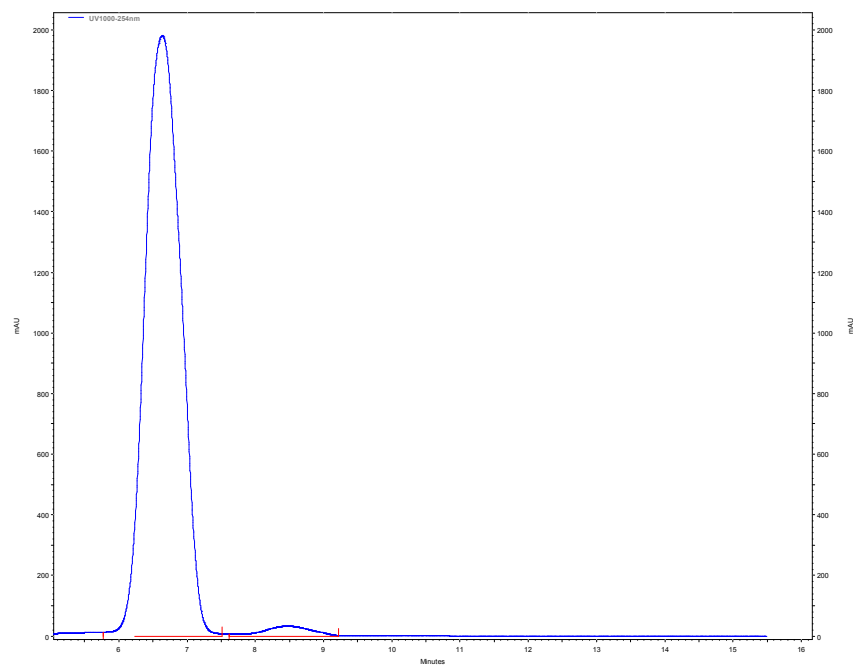

**Fig. 13** HPLC of ethyl phenyl sulfoxide obtained over **PN<sub>427</sub>A<sub>10</sub>-C** after 60 s of UV irradiation (ee value = 97%).

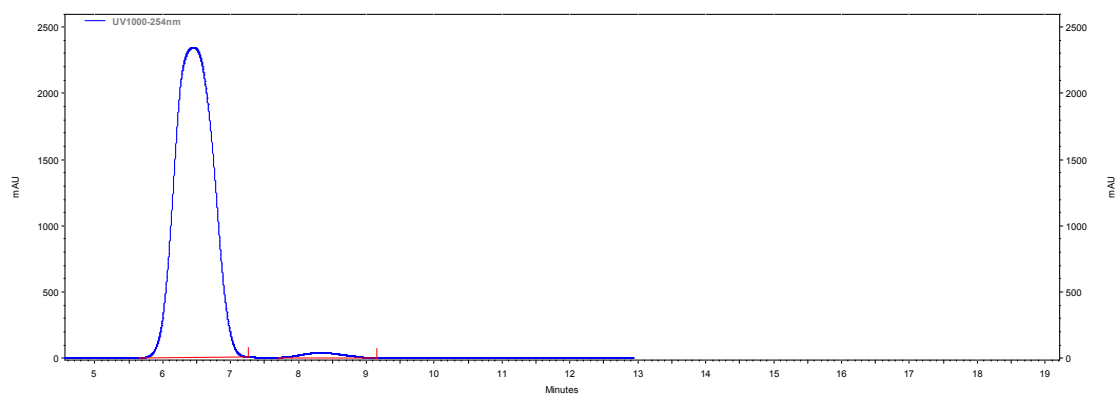

**Fig. 14** HPLC of ethyl phenyl sulfoxide obtained over dark-adapted **PN<sub>427</sub>A<sub>10</sub>-C** (ee value = 97%).

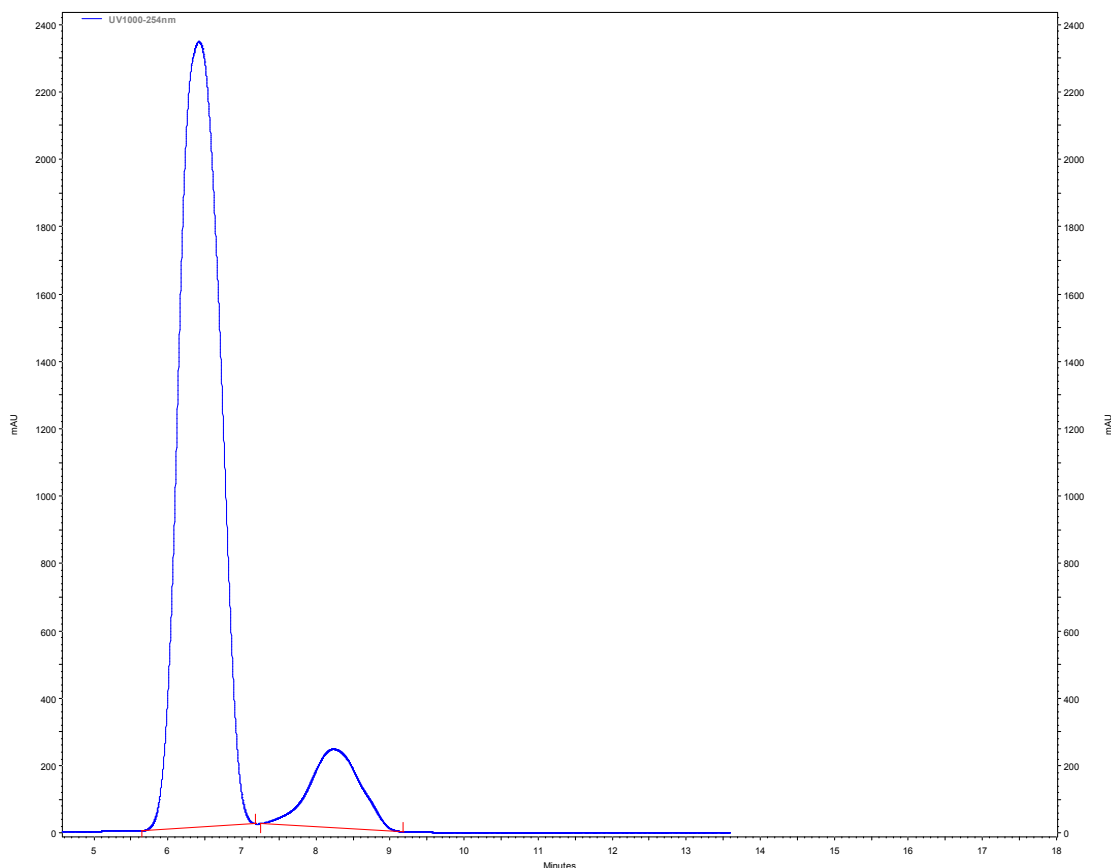

**Fig. 15** HPLC of ethyl phenyl sulfoxide obtained over **neat complex** (ee value = 82%).

**Methyl *p*-methoxyphenyl sulfoxide:** The product has been identified by  $^1\text{H}$  and  $^{13}\text{C}$  NMR spectra (see Fig. S16 and S17).  $^1\text{H}$  NMR ( $\text{CDCl}_3$ , 500 MHz)  $\delta$  (ppm): 7.60-7.57 (d, 2 H, ArH), 7.03-7.01 (d, 2 H, ArH), 3.84 (s, 3 H,  $\text{OCH}_3$ ), 2.69 (s, 3 H,  $\text{SCH}_3$ );  $^{13}\text{C}$  NMR ( $\text{CDCl}_3$ , 125 MHz)  $\delta$  (ppm): 43.9 ( $\text{SCH}_3$ ), 55.5 ( $\text{OCH}_3$ ), 114.8, 125.4, 136.6, 162.0 (ArC). Chemoselectivity was determined by GC, nitrogen was used as the carrier gas with a flow of  $30 \text{ mL}\cdot\text{min}^{-1}$ , injector temperature and detector temperature were  $250^\circ\text{C}$ , the column temperature was programmed from  $80$  to  $180^\circ\text{C}$  with  $6^\circ\text{C}\cdot\text{min}^{-1}$ ,  $t_{\text{methyl } p\text{-methoxyphenyl sulfoxide}} = 11.7 \text{ min}$ ; ee value was determined by HPLC ( $i\text{-PrOH}/n\text{-hexane} = 4: 6 \text{ (v/v)}$ ); flow rate =  $1.0 \text{ mL}\cdot\text{min}^{-1}$ ;  $25^\circ\text{C}$ ;  $\lambda = 254 \text{ nm}$ ; major enantiomer  $t_R = 5.5 \text{ min}$  and minor enantiomer  $t_S = 6.6 \text{ min}$  (see Fig. S18, S19, and S20)

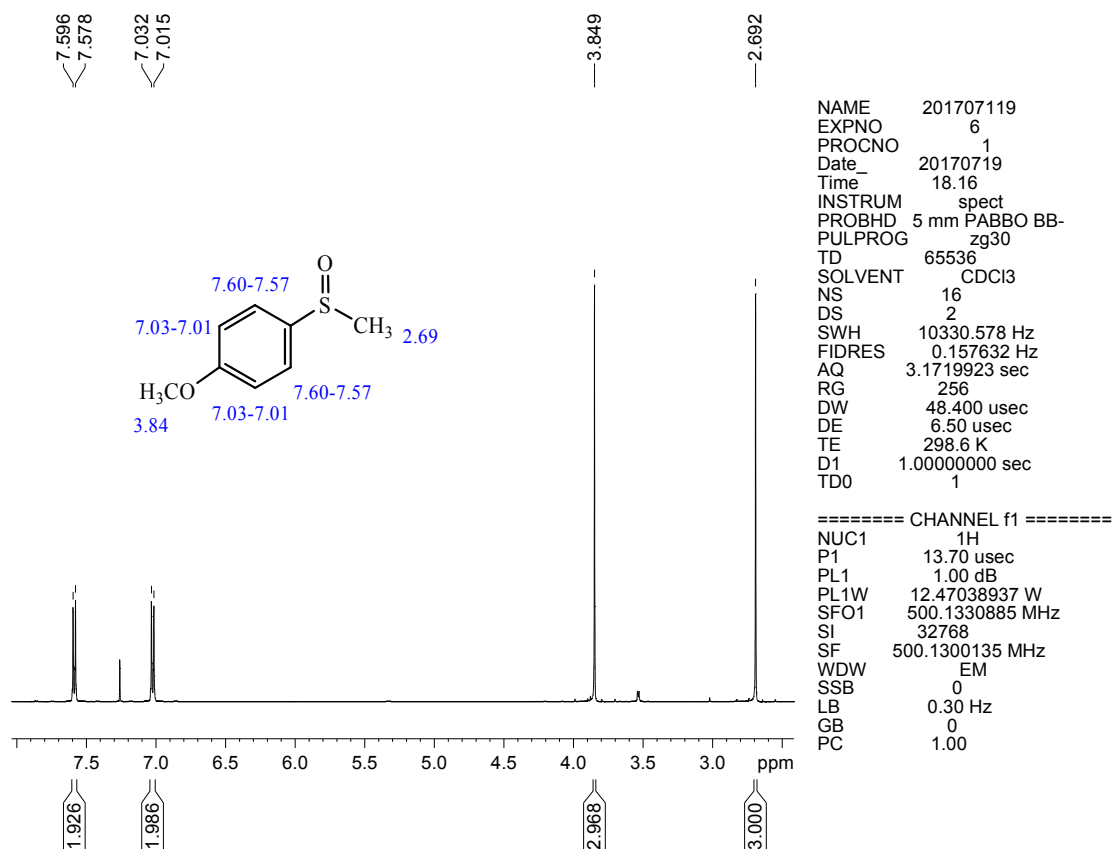

Fig. S16 <sup>1</sup>H NMR of methyl *p*-methoxyphenyl sulfoxide.

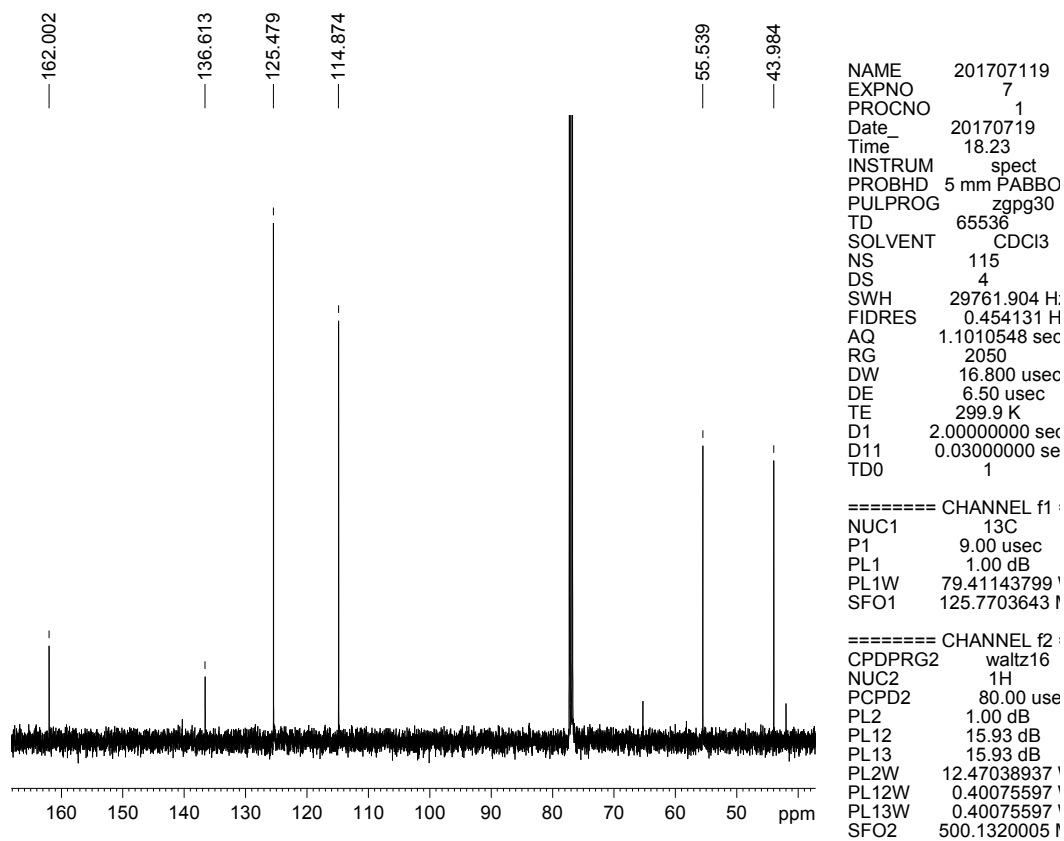

Fig. S17 <sup>13</sup>C NMR of methyl *p*-methoxyphenyl sulfoxide.

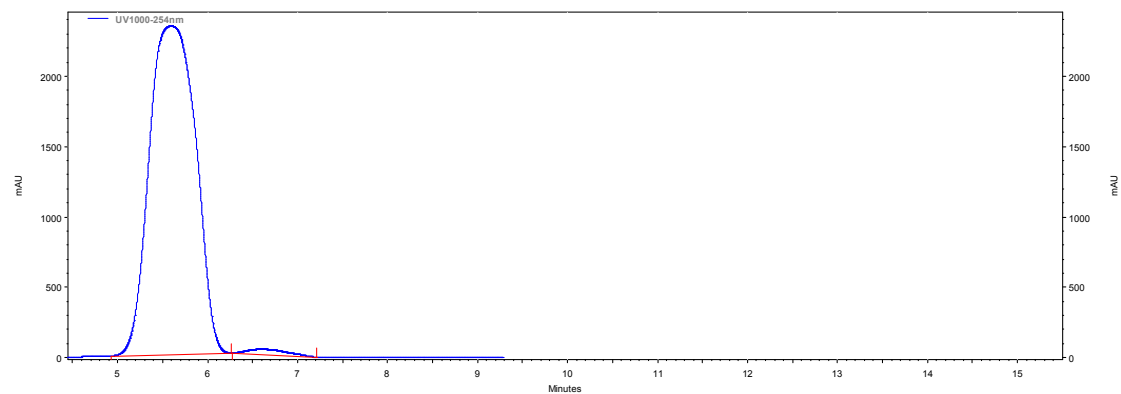

**Fig. S18** HPLC of methyl *p*-methoxyphenyl sulfoxide obtained over **PN<sub>427</sub>A<sub>10</sub>-C** after 60 s of UV irradiation (ee value = 97%)

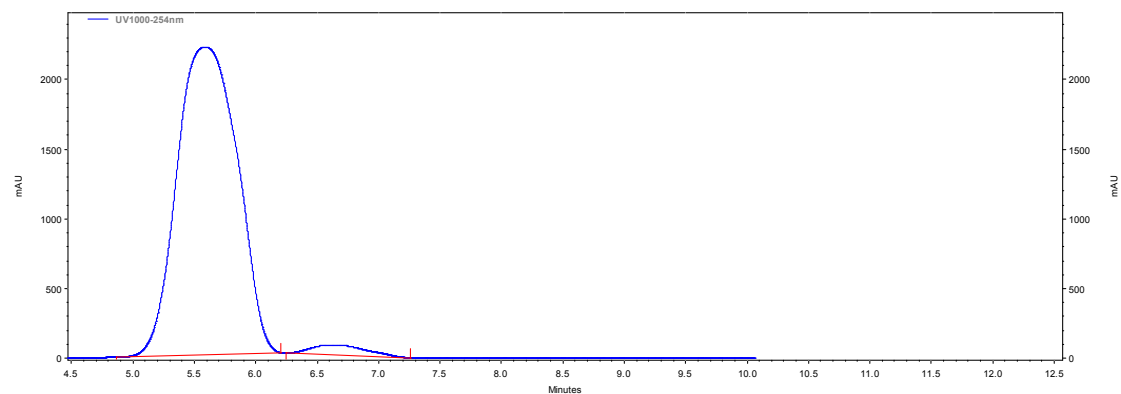

**Fig. S19** HPLC of methyl *p*-methoxyphenyl sulfoxide obtained over dark-adapted **PN<sub>427</sub>A<sub>10</sub>-C** (ee value = 94%).

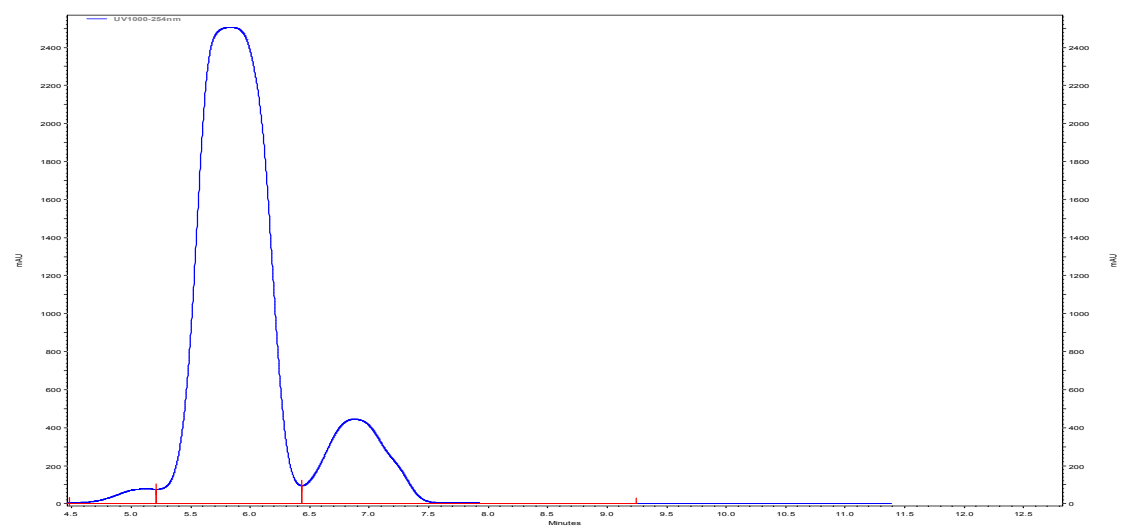

**Fig. S20** HPLC of methyl *p*-methoxyphenyl sulfoxide obtained over neat complex (ee value = 70%)

**Methyl *o*-methoxyphenyl sulfoxide:** The product has been identified by  $^1\text{H}$  and  $^{13}\text{C}$  NMR spectra (see Fig. S21 and S22).  $^1\text{H}$  NMR ( $\text{CDCl}_3$ , 500 MHz)  $\delta$  (ppm): 7.82-7.80 (m, 1 H, ArH), 7.46-7.42 (m, 1 H, ArH), 7.19-7.16 (m, 1 H, ArH), 6.92-6.90 (m, 1 H, ArH), 3.87 (s, 3 H,  $\text{OCH}_3$ ), 2.76 (s, 3 H,  $\text{SCH}_3$ );  $^{13}\text{C}$  NMR ( $\text{CDCl}_3$ , 125 MHz)  $\delta$  (ppm): 41.16 ( $\text{SCH}_3$ ), 55.64 ( $\text{OCH}_3$ ), 110.53, 121.65, 124.58, 131.89, 133.07, 154.76 (ArC). Chemoselectivity was determined by GC, nitrogen was used as the carrier gas with a flow of  $30 \text{ mL}\cdot\text{min}^{-1}$ , injector temperature and detector temperature were  $250^\circ\text{C}$ , the column temperature was  $180^\circ\text{C}$ ,  $t_{\text{methyl } o\text{-methoxyphenyl sulfoxide}} = 9.8 \text{ min}$ ; ee value was determined by HPLC (*i*-PrOH/*n*-hexane = 5: 5 (v/v)); flow rate =  $1.0 \text{ mL}\cdot\text{min}^{-1}$ ;  $25^\circ\text{C}$ ;  $\lambda = 254 \text{ nm}$ ; major enantiomer  $t_R = 4.8 \text{ min}$  and minor enantiomer  $t_S = 5.7 \text{ min}$  (see Fig. S23, S24, and S25).

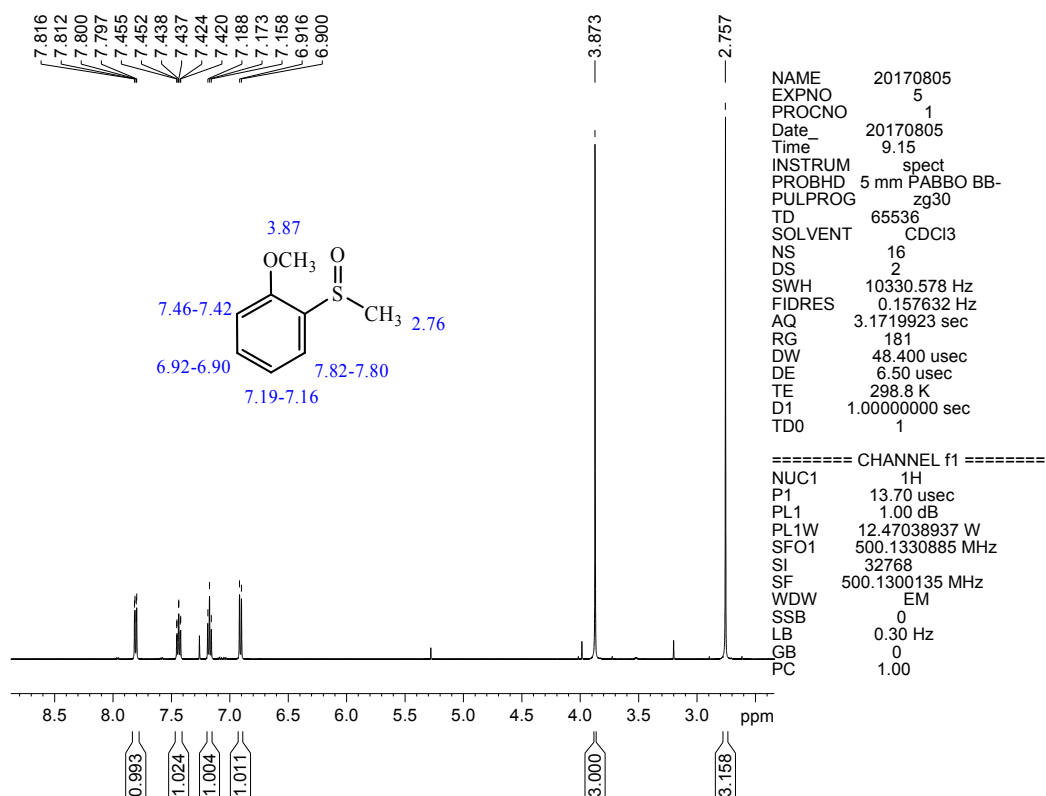

**Fig. S21**  $^1\text{H}$  NMR of methyl *o*-methoxyphenyl sulfoxide.

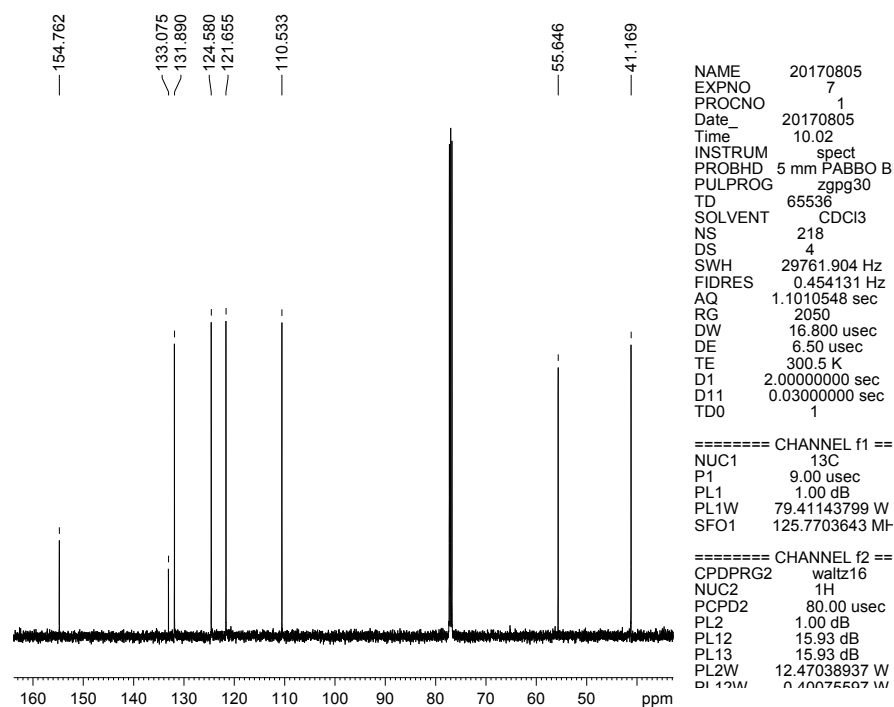

**Fig. S22**  $^{13}\text{C}$  NMR of methyl *o*-methoxyphenyl sulfoxide.

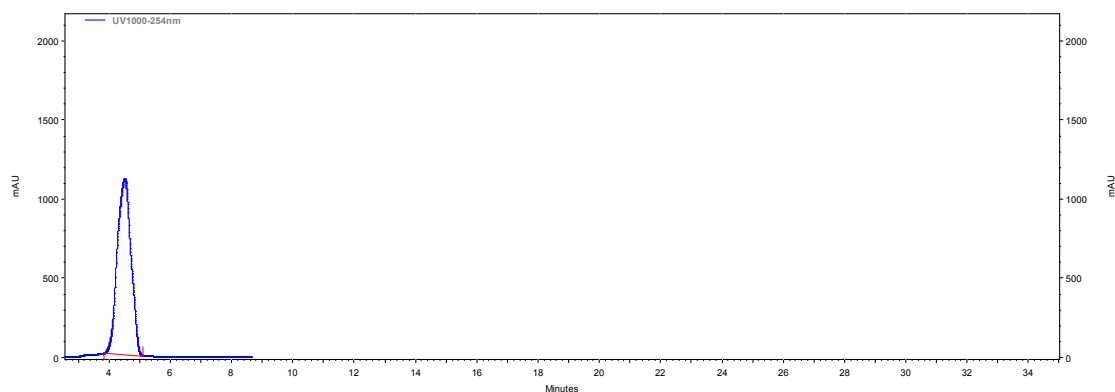

**Fig. S23** HPLC of methyl *o*-methoxyphenyl sulfoxide obtained over  $\text{PN}_{427}\text{A}_{10}\text{-C}$  after 60 s of UV irradiation (ee value > 99%).

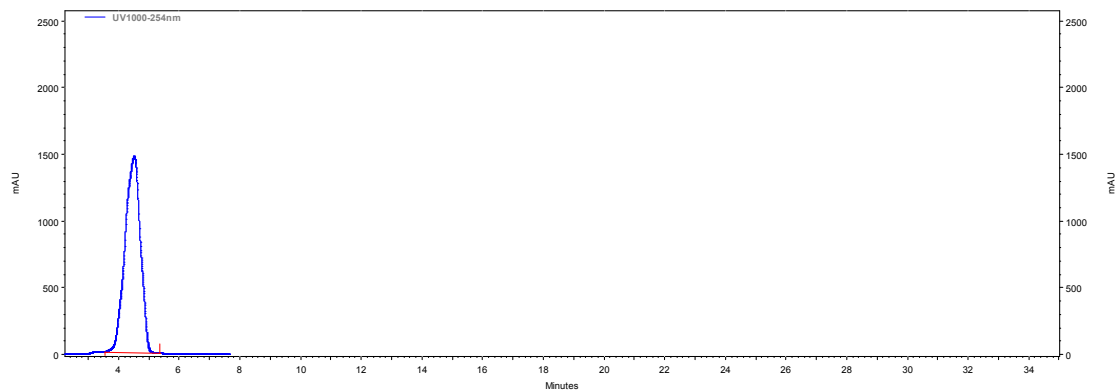

**Fig. S24** HPLC of methyl *o*-methoxyphenyl sulfoxide obtained over dark-adapted  $\text{PN}_{427}\text{A}_{10}\text{-C}$  (ee value > 99%).

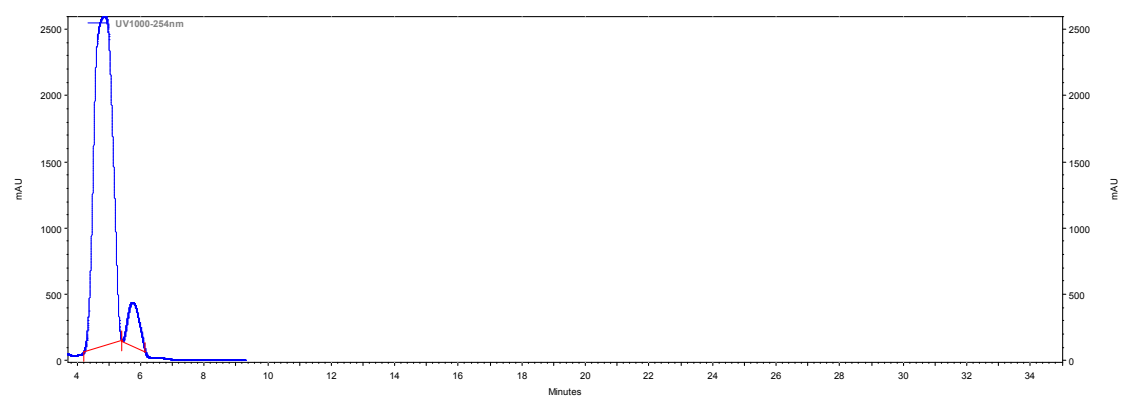

**Fig. S25** HPLC of methyl *o*-methoxyphenyl sulfoxide obtained over neat complex (ee value = 76%).
